# Supplementary material for: Uncovering the antiinflammatory potential of Lactiplantibacillus Plantarum fermented Cannabis Sativa L seeds
Source: Springer Nature journal article supplement (doi:10.1038/s41538-024-00285-8), 2024-06-28
Supplement: MOESM1 [file 41538_2024_285_MOESM1_ESM.pdf]

Supplementary Table 1. List of all known tentatively identified compounds in FHS and RHS using HPLC-ESI-QTOF-MS/MS

| No. | Formula                                                       | Compound Name                                  | Retention Time/min | m/z [M-H] <sup>-</sup> | Area (FHS) | Area (RHS) | Area (Probiotic <i>L. plantarum</i> ) |
|-----|---------------------------------------------------------------|------------------------------------------------|--------------------|------------------------|------------|------------|---------------------------------------|
| 1   | C <sub>9</sub> H <sub>12</sub> N <sub>2</sub> O <sub>4</sub>  | Levoamine                                      | 2.05               | 211.0731               | 58000      | -          | 100                                   |
| 2   | C <sub>17</sub> H <sub>20</sub> N <sub>4</sub> O <sub>6</sub> | Fiboflavin                                     | 15.19              | 375.1307               | 4400       | -          | -                                     |
| 3   | C <sub>20</sub> H <sub>15</sub> NO <sub>5</sub>               | Sanguinarine Pseudobas                         | 19.52              | 348.0882               | -          | 180000     | -                                     |
| 4   | C <sub>13</sub> H <sub>12</sub> N <sub>4</sub> O <sub>2</sub> | 8-Phenyltheophylline                           | 15.14              | 255.0892               | -          | 12000      | -                                     |
| 5   | C <sub>8</sub> H <sub>16</sub> OS <sub>3</sub>                | Foetisulfide A                                 | 20.01              | 223.029                | -          | 1500       | -                                     |
| 6   | C <sub>33</sub> H <sub>44</sub> N <sub>2</sub> O <sub>3</sub> | Dendrocrepin                                   | 16.67              | 515.3278               | -          | 270000     | 720                                   |
| 7   | C <sub>17</sub> H <sub>30</sub> N <sub>4</sub> O <sub>5</sub> | Ala-Leu-Ala-Pro                                | 5.27               | 369.2145               | 19000      | -          | -                                     |
| 8   | C <sub>20</sub> H <sub>30</sub> N <sub>4</sub> O <sub>8</sub> | Ala-Thr-Thr-Tyr                                | 10.22              | 453.1995               | 260000     | -          | -                                     |
| 9   | C <sub>24</sub> H <sub>45</sub> N <sub>5</sub> O <sub>7</sub> | Leu-Val-Thr-Leu-Ala                            | 6.77               | 286.1772               | 42000      | -          | -                                     |
| 10  | C <sub>19</sub> H <sub>30</sub> N <sub>4</sub> O <sub>7</sub> | Asp-Val-Pro-Pro                                | 10.24              | 425.2045               | 25000      | -          | -                                     |
| 11  | C <sub>15</sub> H <sub>25</sub> N <sub>3</sub> O <sub>6</sub> | Val-Glu-Pro                                    | 13.9               | 342.167                | 14000      | -          | -                                     |
| 12  | C <sub>9</sub> H <sub>11</sub> NO <sub>2</sub>                | L-Phenylalanine                                | 2.47               | 164.072                | 1500       | 170000     | 140                                   |
| 13  | C <sub>4</sub> H <sub>9</sub> NO <sub>3</sub>                 | L-Threonine                                    | 0.99               | 118.0514               | -          | 19000      | 2000                                  |
| 14  | C <sub>15</sub> H <sub>17</sub> N <sub>3</sub> O <sub>5</sub> | Asp-Trp                                        | 7.84               | 318.1098               | -          | 1600000    | -                                     |
| 15  | C <sub>5</sub> H <sub>8</sub> O <sub>5</sub>                  | 3-Hydroxypentanedioic Acid                     | 1.35               | 147.0299               | 430000     | 98000      | 500                                   |
| 16  | C <sub>5</sub> H <sub>7</sub> NO <sub>3</sub>                 | L-Pyroglutamic Acid                            | 1.43               | 128.0357               | 580000     | -          | 1000                                  |
| 17  | C <sub>7</sub> H <sub>11</sub> NO <sub>5</sub>                | 2-Acetamidopentanedioic Acid                   | 1.62               | 188.0565               | 440000     | 19000      | 2300                                  |
| 18  | C <sub>10</sub> H <sub>14</sub> N <sub>2</sub> O <sub>6</sub> | Ribosylimidazoleacetic Acid                    | 1.51               | 257.0786               | 130000     | 1900       | 440                                   |
| 19  | C <sub>4</sub> H <sub>6</sub> O <sub>4</sub>                  | Succinic Acid                                  | 1.65               | 117.0196               | 340000     | -          | 200                                   |
| 20  | C <sub>5</sub> H <sub>4</sub> O <sub>3</sub>                  | 2-Furoic Acid                                  | 1.27               | 111.009                | 780000     | -          | 3200                                  |
| 21  | C <sub>11</sub> H <sub>17</sub> NO <sub>8</sub>               | 2,7-Anhydro- $\alpha$ -N-acetylneuraminic Acid | 1.34               | 290.0886               | 300000     | -          | -                                     |
| 22  | C <sub>6</sub> H <sub>8</sub> O <sub>6</sub>                  | Ascorbic Acid                                  | 1.75               | 175.0253               | 370000     | 6700       | 3300                                  |
| 23  | C <sub>5</sub> H <sub>6</sub> O <sub>4</sub>                  | Itaconic Acid                                  | 4.01               | 129.0196               | 170000     | -          | 1000                                  |
| 24  | C <sub>10</sub> H <sub>16</sub> N <sub>2</sub> O <sub>4</sub> | Prolylhydroxyproline                           | 5.62               | 227.1042               | 200000     | -          | -                                     |

|    |                                                               |                                    |       |          |         |         |       |
|----|---------------------------------------------------------------|------------------------------------|-------|----------|---------|---------|-------|
| 25 | C <sub>6</sub> H <sub>12</sub> O <sub>7</sub>                 | Gluconic Acid                      | 17.56 | 195.051  | 1300000 | 3900    | 2800  |
| 26 | C <sub>15</sub> H <sub>16</sub> N <sub>2</sub> O <sub>6</sub> | Propanedioic Acid                  | 10.82 | 319.0938 | 480000  | 480000  | 3200  |
| 27 | C <sub>8</sub> H <sub>15</sub> NO <sub>3</sub>                | 6-Acetamidohexanoic Acid           | 13.75 | 172.0979 | 33000   | 4300    | 3000  |
| 28 | C <sub>4</sub> H <sub>6</sub> O <sub>5</sub>                  | Malic Acid                         | 1.25  | 133.0142 | -       | 460000  | -     |
| 29 | C <sub>6</sub> H <sub>6</sub> O <sub>6</sub>                  | Trans-Aconitic Acid                | 17.27 | 173.0096 | -       | 220000  | -     |
| 30 | C <sub>13</sub> H <sub>14</sub> N <sub>2</sub> O <sub>2</sub> | Tetrahydroharman-3-Carboxylic Acid | 7.74  | 229.0985 | 1700    | 460     | -     |
| 31 | C <sub>11</sub> H <sub>11</sub> NO <sub>3</sub>               | Indolelactic Acid                  | 15.9  | 204.0668 | 2100000 | 5500    | 3100  |
| 32 | C <sub>6</sub> H <sub>8</sub> O <sub>7</sub>                  | Citric Acid                        | 3.28  | 191.0201 | 3900000 | 120000  | 2000  |
| 33 | C <sub>29</sub> H <sub>44</sub> O <sub>6</sub>                | Polygalic Acid                     | 18.03 | 489.2078 | 3200000 | 2200000 | 4000  |
| 34 | C <sub>18</sub> H <sub>32</sub> O <sub>5</sub>                | Corchorifatty Acid F               | 20.07 | 327.2177 | 16000   | 1400000 | -     |
| 35 | C <sub>16</sub> H <sub>11</sub> NO <sub>7</sub>               | 4-Nitro-5-Phenacylphthalic Acid    | 1.98  | 328.0456 | 1000000 | -       | 850   |
| 36 | C <sub>6</sub> H <sub>10</sub> O <sub>8</sub>                 | Saccharolactic Acid                | 1.11  | 209.0307 | 63000   | 120000  | 8300  |
| 37 | C <sub>14</sub> H <sub>16</sub> N <sub>2</sub> O <sub>5</sub> | (2S,4S)-Monatin                    | 7.21  | 291.0995 | 89000   | 430     | -     |
| 38 | C <sub>14</sub> H <sub>18</sub> N <sub>2</sub> O <sub>5</sub> | Aspartame                          | 8.45  | 293.1148 | 15000   | 3000    | -     |
| 39 | C <sub>15</sub> H <sub>10</sub> O <sub>4</sub>                | Daidzein                           | 18.58 | 253.051  | -       | 690000  | -     |
| 40 | C <sub>17</sub> H <sub>15</sub> NO <sub>3</sub>               | Indoprofen                         | 16.61 | 280.0982 | 630000  | 550000  | 330   |
| 41 | C <sub>9</sub> H <sub>17</sub> NO <sub>5</sub>                | Vitamin B5                         | 3.92  | 218.104  | 63000   | 94000   | 600   |
| 42 | C <sub>14</sub> H <sub>8</sub> N <sub>4</sub> O <sub>4</sub>  | 5-Azidoalrestatin                  | 17.3  | 295.0471 | 34000   | 220000  | -     |
| 43 | C <sub>13</sub> H <sub>25</sub> NO <sub>3</sub>               | N-Undecanoylglycine                | 20    | 242.1762 | 1000000 | 990000  | -     |
| 44 | C <sub>19</sub> H <sub>33</sub> N <sub>5</sub> O <sub>7</sub> | p-Coumaric Acid                    | 4.82  | 442.2311 | 7200    | -       | -     |
| 45 | C <sub>9</sub> H <sub>8</sub> O <sub>3</sub>                  | 2-Hydroxycinnamic Acid             | 6.32  | 163.0403 | 20000   | 19000   | 220   |
| 46 | C <sub>7</sub> H <sub>6</sub> O <sub>4</sub>                  | 2,5-Dihydroxybenzoic Acid          | 7.92  | 153.0197 | 260000  | 6200    | 780   |
| 47 | C <sub>30</sub> H <sub>32</sub> O <sub>10</sub>               | Trivaric Acid                      | 19.23 | 551.1921 | 350000  | 550000  | 13000 |
| 48 | C <sub>10</sub> H <sub>15</sub> N <sub>3</sub> O <sub>5</sub> | Benserazide                        | 1.3   | 256.094  | 200000  | 13000   | 5000  |
| 49 | C <sub>12</sub> H <sub>12</sub> N <sub>2</sub> O <sub>2</sub> | 3,3'-Dihydroxybenzidine            | 6.83  | 215.0829 | 29000   | 4100    | 3700  |
| 50 | C <sub>6</sub> H <sub>12</sub> O <sub>6</sub>                 | Glucose                            | 10.6  | 179.0564 | 760000  | 2000000 | 70000 |
| 51 | C <sub>10</sub> H <sub>12</sub> O <sub>4</sub>                | Acetosyringone                     | 15.11 | 195.0667 | 260000  | 2400    | 7500  |
| 52 | C <sub>16</sub> H <sub>12</sub> O <sub>6</sub>                | Diosmetin                          | 19.76 | 299.0564 | 550000  | 120000  | 9600  |

|    |                                                               |                                               |       |          |          |         |       |
|----|---------------------------------------------------------------|-----------------------------------------------|-------|----------|----------|---------|-------|
| 53 | C <sub>5</sub> H <sub>12</sub> N <sub>8</sub> S               | Ethyl 4-hydroxybenzoate                       | 13.43 | 215.0834 | 13000    | 1800    | -     |
| 54 | C <sub>17</sub> H <sub>15</sub> NO <sub>4</sub>               | Eutropoflavin                                 | 15.59 | 296.0931 | 340000   | 190000  | 560   |
| 55 | C <sub>23</sub> H <sub>32</sub> N <sub>4</sub> O <sub>8</sub> | Caspase-1 Inhibitor I                         | 16.83 | 491.215  | 37000    | -       | 4000  |
| 56 | C <sub>17</sub> H <sub>17</sub> NO <sub>4</sub>               | N-Caffeoyltyramine                            | 17.35 | 298.1075 | 28000000 | 1300000 | 20000 |
| 57 | C <sub>28</sub> H <sub>31</sub> NO <sub>8</sub>               | Hygrocin A                                    | 17.9  | 508.1974 | 1600000  | 180000  | 50000 |
| 58 | C <sub>29</sub> H <sub>31</sub> NO <sub>8</sub>               | Desacetylravidomycin                          | 18.6  | 520.1975 | 340000   | 56000   | 9300  |
| 59 | C <sub>18</sub> H <sub>32</sub> O <sub>5</sub>                | 9,12,13-trihydroxy-10,15-octadecadienoic acid | 17.02 | 328.0211 | 1100     | 410000  | 900   |
| 60 | C <sub>34</sub> H <sub>32</sub> N <sub>2</sub> O <sub>8</sub> | Cannabisin B                                  | 18.86 | 595.2082 | 5700     | 2900000 | -     |
| 61 | C <sub>34</sub> H <sub>30</sub> N <sub>8</sub> O <sub>6</sub> | 1,3-Benzenediol                               | 19.44 | 645.2218 | 1400000  | 360000  | 67000 |
| 62 | C <sub>10</sub> H <sub>14</sub> N <sub>2</sub> O <sub>4</sub> | Carbidopa                                     | 3.3   | 225.0877 | -        | 3500    | -     |
| 63 | C <sub>14</sub> H <sub>23</sub> N <sub>3</sub> O <sub>6</sub> | Valclavam                                     | 4.71  | 328.1514 | 10000    | -       | 8600  |
| 64 | C <sub>10</sub> H <sub>9</sub> N <sub>7</sub> O               | Furterene                                     | 1.02  | 242.0801 | 720000   | 290000  | 720   |
| 65 | C <sub>17</sub> H <sub>17</sub> NO <sub>4</sub>               | N-[(diphenylmethoxy)acetyl]-glycine           | 1.28  | 176.9361 | 43000    | 210000  | 4000  |
| 66 | C <sub>12</sub> H <sub>24</sub> N <sub>2</sub> S <sub>2</sub> | N,N'-Dipentylethanedithioamide                | 1.32  | 259.1306 | 14000    | 310     | -     |
| 67 | C <sub>29</sub> H <sub>41</sub> N <sub>5</sub> O <sub>9</sub> | Tigecycline Hydrate                           | 11.48 | 602.2831 | -        | 2200    | -     |
| 68 | C <sub>11</sub> H <sub>18</sub> N <sub>2</sub> O <sub>4</sub> | 3'-Hydroxyamobarbital                         | 12.64 | 241.1198 | 470000   | -       | 6900  |
| 69 | C <sub>17</sub> H <sub>23</sub> N <sub>7</sub> O              | Phidianidine B                                | 16.71 | 340.1885 | 87000    | -       | 500   |
| 70 | C <sub>18</sub> H <sub>19</sub> NO <sub>4</sub>               | Feruloyltyramine                              | 18.09 | 312.1235 | 14000000 | 6700000 | 73000 |
| 71 | C <sub>22</sub> H <sub>24</sub> N <sub>2</sub> O <sub>4</sub> | Bis-Coumaramidobutane                         | 18.29 | 379.1664 | 260000   | 380000  | -     |
| 72 | C <sub>11</sub> H <sub>10</sub> N <sub>6</sub>                | Bentemazole                                   | 3.42  | 225.0885 | 120000   | -       | 770   |
| 73 | C <sub>21</sub> H <sub>17</sub> NO <sub>5</sub>               | Dihydrochelirubine                            | 19.98 | 362.1032 | 1300000  | 40000   | 2900  |
| 74 | C <sub>25</sub> H <sub>34</sub> N <sub>4</sub> O <sub>8</sub> | Cinitapride                                   | 14.83 | 517.2299 | 3600     | -       | 300   |
| 75 | C <sub>12</sub> H <sub>15</sub> NO <sub>4</sub>               | 3-Hydroxycarbofuran                           | 17.07 | 236.0933 | 66000    | 1000    | 3500  |
| 76 | C <sub>7</sub> H <sub>2</sub> N <sub>4</sub> O <sub>2</sub>   | 3-Nitropyridine-2,4-Dicarbonitrile            | 17.28 | 173.0107 | 38000    | 220000  | -     |
| 77 | C <sub>30</sub> H <sub>55</sub> N <sub>5</sub> O <sub>5</sub> | Clavatuside A                                 | 17.61 | 564.4125 | 340000   | -       | 2500  |
| 78 | C <sub>28</sub> H <sub>29</sub> NO <sub>7</sub>               | Desmethylocaglamide                           | 18.67 | 490.1869 | 1200000  | 470000  | 2100  |

|     |                                                               |                                        |       |          |         |          |       |
|-----|---------------------------------------------------------------|----------------------------------------|-------|----------|---------|----------|-------|
| 79  | C <sub>26</sub> H <sub>43</sub> N <sub>5</sub> O <sub>7</sub> | Des(Benzylpyridyl) Atazanavir          | 18.72 | 536.309  | 21000   | -        | 840   |
| 80  | C <sub>2</sub> H <sub>2</sub> N <sub>2</sub> O <sub>8</sub>   | 1,2-Bis(Nitrooxy)-1,2-Ethanedione      | 19.41 | 180.9733 | 89000   | 36000    | 3000  |
| 81  | C <sub>25</sub> H <sub>14</sub> N <sub>2</sub>                | [(Coronen-1-yl) methylidene] Hydrazine | 1.06  | 341.1092 | 120000  | 16000000 | 300   |
| 82  | C <sub>4</sub> H <sub>8</sub> N <sub>2</sub> O <sub>6</sub> S | N-Hydroxysulfosuccinamide              | 2.53  | 211.002  | 410000  | -        | 280   |
| 83  | C <sub>14</sub> H <sub>16</sub> N <sub>2</sub> O <sub>3</sub> | Phetharbital                           | 7.52  | 259.1091 | 22000   | -        | 16000 |
| 84  | C <sub>18</sub> H <sub>28</sub> O <sub>9</sub>                | Tuberonic Acid Glucoside               | 13.87 | 387.1666 | 230000  | -        | 39000 |
| 85  | C <sub>14</sub> H <sub>16</sub> N <sub>2</sub> O <sub>4</sub> | 5-Benzylacetylouidine                  | 15.65 | 275.1045 | 190000  | 19000    | 11000 |
| 86  | C <sub>9</sub> H <sub>10</sub> O <sub>4</sub>                 | Homovanillic acid                      | 13.05 | 301.1089 | 220000  | 7600     | 590   |
| 87  | C <sub>17</sub> H <sub>13</sub> N <sub>7</sub>                | Aplidiopsamine A                       | 16.35 | 314.1153 | 150000  | -        | 1400  |
| 88  | C <sub>7</sub> H <sub>10</sub> N <sub>6</sub> O <sub>2</sub>  | 8-Hydrazinotheophylline                | 18.12 | 209.0802 | 490000  | 480000   | 2200  |
| 89  | C <sub>20</sub> H <sub>17</sub> NS                            | 2-(1-Phenylethyl)-10H-Phenothiazine    | 1.00  | 302.1017 | -       | 150000   | -     |
| 90  | C <sub>6</sub> H <sub>2</sub> N <sub>4</sub>                  | Pyrazine-2,3-Dicarbonitrile            | 3.69  | 129.0204 | -       | 730      | -     |
| 91  | C <sub>5</sub> H <sub>10</sub> O <sub>3</sub>                 | 2-Methoxyethyl Acetate                 | 4.96  | 117.0559 | 370000  | 770      | 9300  |
| 92  | C <sub>9</sub> H <sub>16</sub> N <sub>2</sub> O <sub>2</sub>  | Apronal                                | 5.61  | 183.1143 | 61000   | -        | 7000  |
| 93  | C <sub>9</sub> H <sub>17</sub> NO <sub>4</sub>                | Acetylcarnitine                        | 1.68  | 202.1088 | 510     | 950      | -     |
| 94  | C <sub>15</sub> H <sub>23</sub> N <sub>3</sub> O <sub>5</sub> | Streptocytosine F                      | 8.37  | 324.1557 | 4700    | -        | -     |
| 95  | C <sub>18</sub> H <sub>19</sub> NO <sub>5</sub>               | Cantharidin                            | 17.04 | 328.1193 | 380000  | 380000   | 5800  |
| 96  | C <sub>17</sub> H <sub>17</sub> NO <sub>3</sub>               | Morphinone                             | 17.94 | 282.1132 | 5300000 | 4600000  | 68000 |
| 97  | C <sub>15</sub> H <sub>10</sub> O <sub>6</sub>                | Fisetin                                | 19.16 | 285.0404 | 1900000 | 210000   | 82000 |
| 98  | C <sub>5</sub> H <sub>5</sub> N <sub>5</sub> O                | Guanine                                | 3.25  | 150.0423 | 760000  | -        | 400   |
| 99  | C <sub>14</sub> H <sub>17</sub> N <sub>5</sub> O <sub>8</sub> | Succinyladenosine                      | 6.18  | 382.1008 | 58000   | 39000    | 93000 |
| 100 | C <sub>10</sub> H <sub>13</sub> N <sub>5</sub> O              | Isopentenyladenine                     | 3.93  | 218.1041 | 160000  | 390      | 3000  |
| 101 | C <sub>9</sub> H <sub>12</sub> N <sub>2</sub> O <sub>6</sub>  | Uracil Riboside                        | 1.31  | 243.0628 | 210000  | -        | 5500  |
| 102 | C <sub>6</sub> H <sub>12</sub> O <sub>3</sub>                 | 2-Ethoxyethyl Acetate                  | 11.12 | 131.0716 | 4200    | 320000   | -     |
| 103 | C <sub>15</sub> H <sub>22</sub> O <sub>5</sub>                | Artemisinin                            | 13.94 | 281.1399 | 360000  | 190000   | -     |
| 104 | C <sub>9</sub> H <sub>10</sub> O <sub>3</sub>                 | Ethylparaben                           | 14.34 | 165.0559 | 33000   | -        | 77000 |
| 105 | C <sub>20</sub> H <sub>27</sub> N <sub>3</sub> O <sub>6</sub> | Phebarbamate                           | 16.08 | 404.1832 | 46000   | -        | 5900  |

---

|     |                                                  |                   |       |          |       |        |   |
|-----|--------------------------------------------------|-------------------|-------|----------|-------|--------|---|
| 106 | C <sub>20</sub> H <sub>38</sub> O <sub>7</sub> S | Docusate Hydrogen | 19.01 | 421.2266 | 53000 | 22000  | - |
| 107 | C <sub>29</sub> H <sub>28</sub> O <sub>9</sub>   | Schisantherin D   | 19.3  | 519.1658 | 44000 | 430000 | - |

---

FHS, *L. plantarum* fermented hemp seeds; RHS, raw (unfermented) hemp seeds.
